# Supplementary material for: The Circulating Transcriptome as a Source of Biomarkers for Melanoma
Source: PubMed Central journal article supplement (PMC6356785; doi:10.3390/cancers11010070), 2019-01-10
Supplement: cancers-11-00070-s001.pdf [file cancers-11-00070-s001.pdf]

## Supplemental Materials

# The Circulating Transcriptome as a Source of Biomarkers for Melanoma

Carla Solé, Daniela Tramonti, Maïke Schramm, Ibai Goicoechea, María Armesto, Luiza I. Hernandez, Lorea Manterola, Marta Fernandez-Mercado, Karmele Mujika, Anna Tuneu, Ane Jaka, Maitena Tellaetxe, Marc R. Friedländer, Xavier Estivill, Paolo Piazza, Pablo L. Ortiz-Romero, Mark R. Middleton <sup>2</sup> and Charles H. Lawrie

(A)

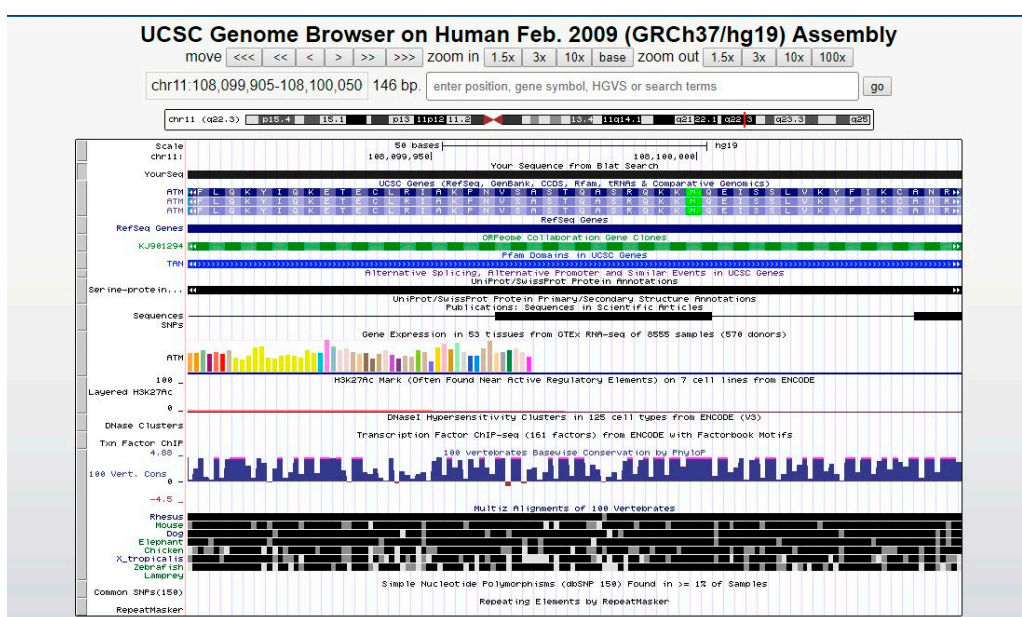

(B)

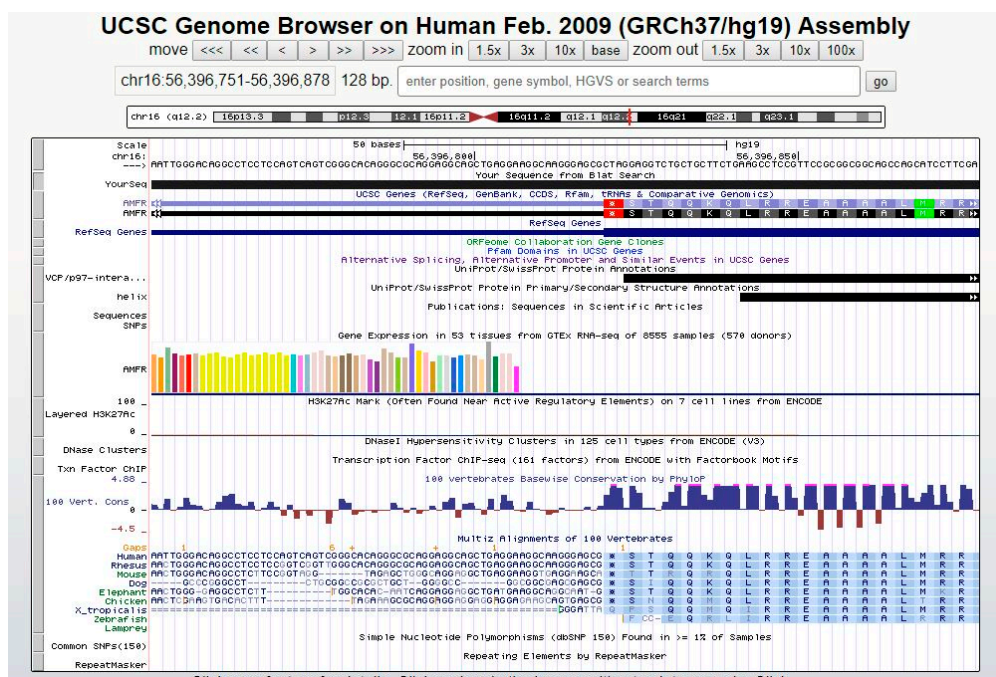

(C)

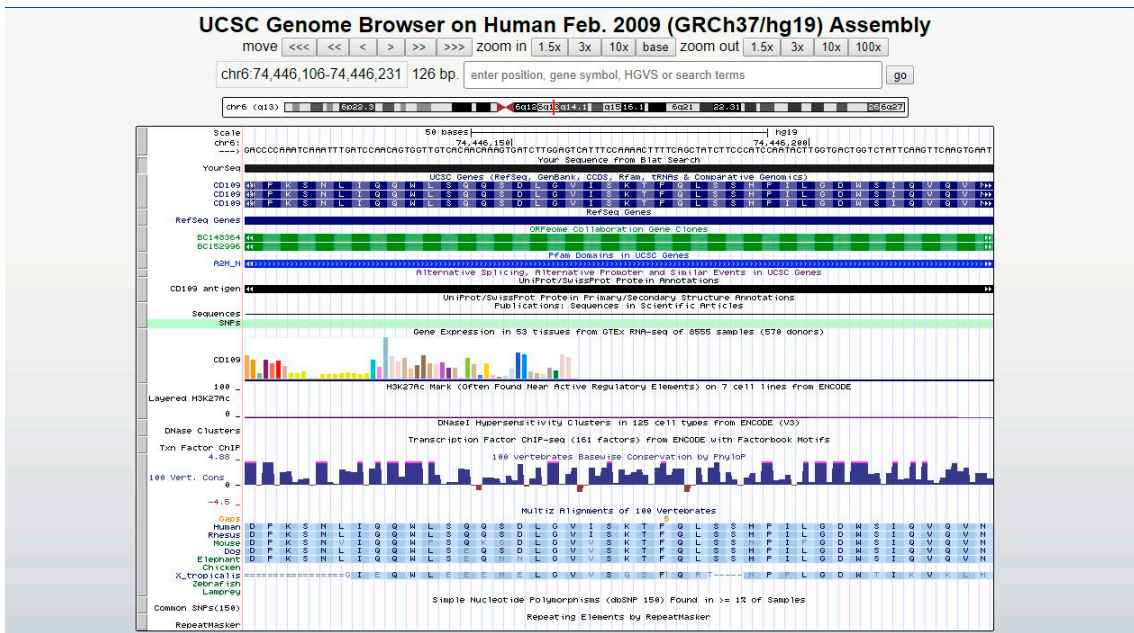

(D)

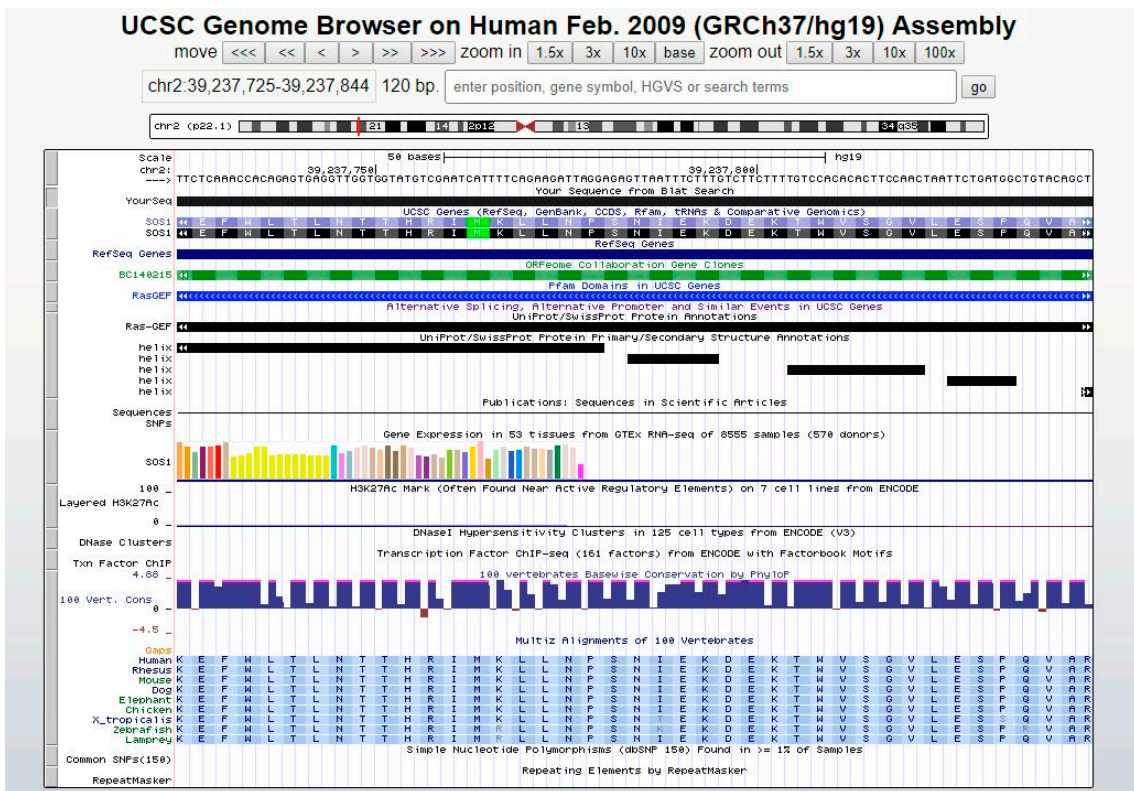

Figure S1. Mapping positions (GRCh37) of selected gene fragment probe sets used to design Taqman probes. (A) ATM (aa63-109) probe sequence, (B) AMFR (5'UTR+aa1-10) probe sequence; (C) CD109 (aa170-211) probe sequence, (D) CD109 (aa798-836) probe sequence.

**A**

| Gene name            | Stability value | Best gene                                         | miR-191            |
|----------------------|-----------------|---------------------------------------------------|--------------------|
| miR-24               | 0.016           | Stability value                                   | 0.009              |
| miR-35               | 0.011           |                                                   |                    |
| miR-191              | 0.009           | Best combination of two genes                     | miR-24 and miR-191 |
|                      |                 | Stability value for best combination of two genes | 0.002              |
| Intragroup variation |                 |                                                   |                    |
| Group identifier     | 0               | 1                                                 | 2                  |
| miR-24               | 0.006           | 0.004                                             | 0.002              |
| miR-35               | 0.001           | 0.000                                             | 0.001              |
| miR-191              | 0.001           | 0.002                                             | 0.001              |
| Intergroup variation |                 |                                                   |                    |
| Group identifier     | 0               | 1                                                 | 2                  |
| miR-24               | -0.011          | 0.012                                             | -0.001             |
| miR-35               | 0.011           | -0.012                                            | 0.000              |
| miR-191              | 0.000           | 0.000                                             | 0.000              |

**B**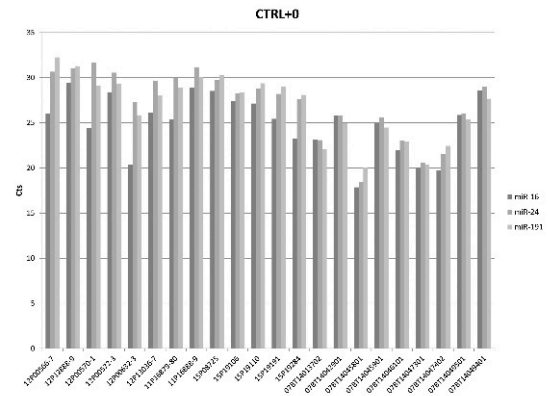**C**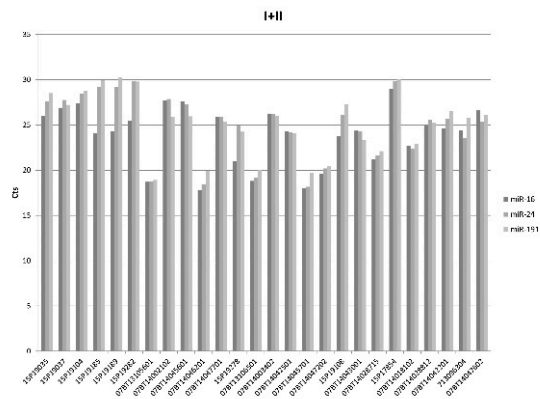**D**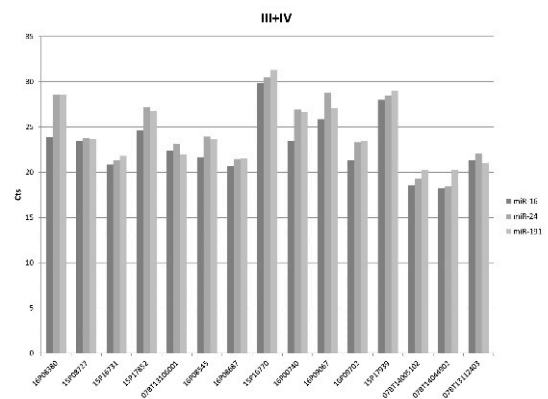

**Figure S2.** Variation of Ct values in levels of miRNA reference genes in selected cohort measured by qRT-PCR. **(A)** NormFinder analysis of levels of *miR-16*, *miR-24* and *miR-191*. **(B)** Levels of miRNAs in healthy and stage 0 patient cohort, **(C)** in stage I/II cohort and stage III/IV cohort.

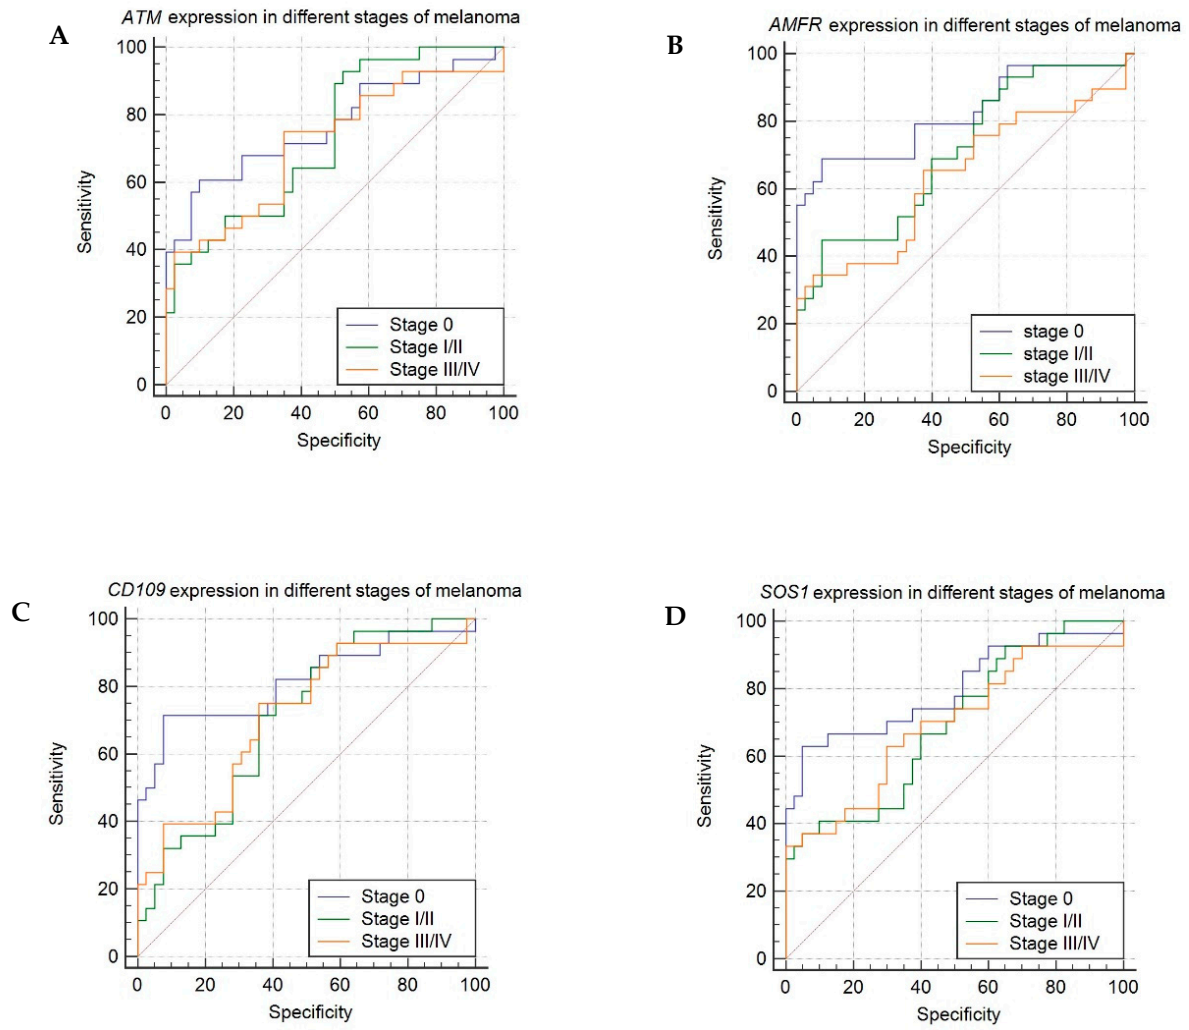

**Figure S3.** ROC analysis of mRNA expression in different melanoma stage cohorts. (A) *ATM*, (B) *AMFR*, (C) *CD109*, (D) *SOS1* expression.



**Table S1.** Clinical details of patients used for NGS cohort. NK—not known.

| ID          | Gender | Age | Stage | TMN                     |
|-------------|--------|-----|-------|-------------------------|
| pool-0#1    | Female | 79  | 0     | Melanoma in situ        |
| pool-0#2    | Female | 80  | 0     | Melanoma in situ        |
| pool-0#3    | Male   | 65  | 0     | Melanoma in situ        |
| pool-0#4    | Female | 58  | 0     | Lentigo maligna in situ |
| pool-0#5    | Male   | 76  | 0     | Lentigo maligna in situ |
| pool-I/II#1 | Female | 62  | IA    | T1aN0M0                 |
| pool-I/II#2 | Male   | 60  | IA    | T1aN0M0                 |
| pool-I/II#3 | Male   | 82  | IA    | T1aN0M0                 |
| pool-I/II#4 | Male   | 35  | IA    | T1aN0M0                 |
| pool-I/II#5 | Female | 61  | IA    | T1aN0M0                 |
| pool-I/II#6 | Female | 81  | IA    | T1aN0M0                 |
| pool-I/II#7 | Male   | 84  | IIIB  | T4bN0M0                 |
| pool-I/II#8 | Female | 64  | IA    | T1aN0M0                 |
| pool-III#1  | Female | 83  | IIIB  | T2bN2cM0                |
| pool-III#2  | Female | 67  | IIIC  | TxN3M0                  |
| pool-III#3  | Female | 48  | IIIB  | T2xN2cM0                |
| pool-III#4  | Male   | 55  | IIIC  | T2aN3M0                 |
| pool-III#5  | Male   | 80  | IIIB  | T2aN2cM0                |
| pool-III#6  | Female | 68  | IIIC  | T4aN0M0                 |
| pool-III#7  | Female | 89  | IIIA  | T3aN2cM0                |
| pool-III#8  | Male   | 61  | IIIA  | T3aN2cM0                |
| pool-IV#1   | Female | 54  | IV    | T3bN0M1                 |
| pool-IV#2   | Female | 79  | IV    | T4bN1M1                 |
| pool-IV#3   | Male   | 73  | IV    | T3aN3M1                 |
| pool-IV#4   | Female | 53  | IV    | T4bN1bM1                |
| pool-IV#5   | Male   | 58  | IV    | T4bN3M1                 |
| pool-IV#6   | Male   | 51  | IV    | T3bN3M1                 |
| pool-IV#7   | Female | 60  | IV    | TxN3m1                  |
| pool-IV#8   | Female | 82  | IV    | TxNxM1                  |
| pool-cont#1 | Female | 60  | -     | -                       |
| pool-cont#2 | Female | 65  | -     | -                       |
| pool-cont#3 | Male   | 57  | -     | -                       |
| pool-cont#4 | Male   | 58  | -     | -                       |
| pool-cont#5 | Male   | 53  | -     | -                       |
| pool-cont#6 | Male   | 58  | -     | -                       |
| pool-cont#7 | Female | 62  | -     | -                       |
| pool-cont#8 | Female | 58  | -     | -                       |

**Table S2.** Clinical details of patients used in mRNA validation cohort. NK—not known.

| ID     | Origin   | Gender | Age | Stage   | TNM |
|--------|----------|--------|-----|---------|-----|
| Cont#1 | Biobanco | Female | 64  | Control | -   |
| Cont#2 | Biobanco | Female | 70  | Control | -   |
| Cont#3 | Biobanco | Female | 67  | Control | -   |
| Cont#4 | Biobanco | Female | 56  | Control | -   |
| Cont#5 | Biobanco | Female | 68  | Control | -   |

|         |          |        |    |         |                          |
|---------|----------|--------|----|---------|--------------------------|
| Cont#6  | Biobanco | Male   | 62 | Control | -                        |
| Cont#7  | Biobanco | Male   | 57 | Control | -                        |
| Cont#8  | Biobanco | Male   | 60 | Control | -                        |
| Cont#9  | Biobanco | Male   | 63 | Control | -                        |
| Cont#10 | Biobanco | Male   | 67 | Control | -                        |
| Cont#11 | Biobanco | Female | 59 | Control | -                        |
| Cont#12 | Biobanco | Female | 53 | Control | -                        |
| Cont#13 | Biobanco | Female | 55 | Control | -                        |
| Cont#14 | Biobanco | Female | 64 | Control | -                        |
| Cont#15 | Biobanco | Male   | 54 | Control | -                        |
| Cont#16 | Biobanco | Male   | 55 | Control | -                        |
| Cont#17 | Biobanco | Male   | 54 | Control | -                        |
| Cont#18 | Biobanco | Male   | 53 | Control | -                        |
| Cont#19 | Biobanco | Female | 29 | Control | -                        |
| Cont#20 | Biobanco | Female | 24 | Control | -                        |
| Cont#21 | Biobanco | Female | 26 | Control | -                        |
| Cont#22 | Biobanco | Male   | 22 | Control | -                        |
| Cont#23 | Biobanco | Male   | 28 | Control | -                        |
| Cont#24 | Biobanco | Female | 43 | Control | -                        |
| Cont#25 | Biobanco | Female | 31 | Control | -                        |
| Cont#26 | Biobanco | Female | 33 | Control | -                        |
| Cont#27 | Biobanco | Female | 34 | Control | -                        |
| Cont#28 | Biobanco | Female | 50 | Control | -                        |
| Cont#29 | Biobanco | Male   | 42 | Control | -                        |
| Cont#30 | Biobanco | Male   | 30 | Control | -                        |
| Cont#31 | Biobanco | Female | 45 | Control | -                        |
| Cont#32 | Biobanco | Male   | 35 | Control | -                        |
| Cont#33 | Biobanco | Male   | 50 | Control | -                        |
| Cont#34 | Biobanco | Female | 31 | Control | -                        |
| Cont#35 | Biobanco | Male   | NK | Control | -                        |
| Cont#36 | Biobanco | Female | NK | Control | -                        |
| Cont#37 | Biobanco | Male   | 59 | Control | -                        |
| Cont#38 | Biobanco | Female | 54 | Control | -                        |
| Cont#39 | Biobanco | Female | 60 | Control | -                        |
| Cont#40 | Biobanco | Male   | 53 | Control | -                        |
| Cont#41 | Biobanco | Female | 62 | Control | -                        |
| mRNA#1  | Madrid   | Male   | 77 | 0       | -                        |
| mRNA#2  | Madrid   | Male   | 46 | 0       | TisN0M0                  |
| mRNA#3  | Madrid   | Female | 57 | 0       | TisN0M0                  |
| mRNA#4  | Madrid   | Female | 68 | 0       | TisN0M0                  |
| mRNA#5  | Madrid   | Male   | 45 | 0       | TisN0M0                  |
| mRNA#6  | Madrid   | Female | 85 | 0       | TisN0M0                  |
| mRNA#7  | Madrid   | Female | 78 | 0       | TisN0M0                  |
| mRNA#8  | Madrid   | Male   | 56 | 0       | TisN0M0                  |
| mRNA#9  | Madrid   | Male   | 84 | 0       | TisN0M0                  |
| mRNA#10 | Madrid   | Male   | 40 | 0       | Melanoma in situ         |
| mRNA#11 | Madrid   | Male   | 66 | 0       | Léntigo maligno. In situ |

|         |               |        |    |     |                          |
|---------|---------------|--------|----|-----|--------------------------|
| mRNA#12 | Madrid        | Male   | 52 | 0   | Léntigo maligno. In situ |
| mRNA#13 | Madrid        | Female | 84 | 0   | Léntigo maligno. In situ |
| mRNA#14 | Madrid        | Male   | 43 | 0   | Léntigo maligno. In situ |
| mRNA#15 | Madrid        | Female | 33 | 0   | TisN0M0                  |
| mRNA#16 | San Sebastián | Male   | 64 | 0   | pT1sN0                   |
| mRNA#17 | San Sebastián | NK     | 67 | 0   | pT1sN0M0                 |
| mRNA#18 | San Sebastián | Female | 68 | 0   | pT1sN0                   |
| mRNA#19 | San Sebastián | Female | 73 | 0   | pT1sN0M0                 |
| mRNA#20 | San Sebastián | Female | 60 | 0   | pT1sN0M0                 |
| mRNA#21 | San Sebastián | Female | 70 | 0   | pT1sN0M0                 |
| mRNA#22 | San Sebastián | Male   | 57 | 0   | pT1sN0M0                 |
| mRNA#23 | San Sebastián | Female | 59 | 0   | pT1sN0M0                 |
| mRNA#24 | San Sebastián | Female | 71 | 0   | pT1sN0M0                 |
| mRNA#25 | San Sebastián | Female | 46 | 0   | pT1sN0M0                 |
| mRNA#26 | San Sebastián | Female | 64 | 0   | pT1sN0M0                 |
| mRNA#27 | San Sebastián | Female | 76 | 0   | TisN0M0                  |
| mRNA#28 | San Sebastián | Female | 75 | 0   | TisN0M0                  |
| mRNA#29 | San Sebastián | Female | 40 | 0   | TisN0M0                  |
| mRNA#30 | Madrid        | Male   | 47 | IA  | T1aN0M0                  |
| mRNA#31 | Madrid        | Female | 72 | IA  | T1aN0M0                  |
| mRNA#32 | Madrid        | Female | 81 | IA  | T1aN0M0                  |
| mRNA#33 | Madrid        | Female | 43 | IA  | T1aN0M0                  |
| mRNA#34 | Madrid        | Female | 37 | IA  | T1aN0M0                  |
| mRNA#35 | Madrid        | Male   | 42 | IA  | T1aN0M0                  |
| mRNA#36 | Madrid        | Male   | 57 | IA  | T1aN0M0                  |
| mRNA#37 | Madrid        | Male   | 70 | IB  | T2aN0M0                  |
| mRNA#38 | Madrid        | Female | 80 | IB  | T1bN0M0                  |
| mRNA#39 | Madrid        | Female | 69 | IB  | T1bN0M0                  |
| mRNA#40 | Madrid        | Male   | 40 | IB  | T2aN0M0                  |
| mRNA#41 | Madrid        | Male   | 86 | IB  | T2aN0M0                  |
| mRNA#42 | Madrid        | Female | 37 | IB  | T2aN0M0                  |
| mRNA#43 | Madrid        | Female | 51 | IIA | T2bN0M0                  |
| mRNA#44 | Madrid        | Male   | 79 | IIA | T3aN0M0                  |
| mRNA#45 | AVAST-M       | Female | 61 | IIB | NK                       |
| mRNA#46 | AVAST-M       | Male   | 47 | IIB | NK                       |
| mRNA#47 | AVAST-M       | Male   | 72 | IIB | NK                       |
| mRNA#48 | AVAST-M       | Male   | 38 | IIB | NK                       |
| mRNA#49 | AVAST-M       | Female | 36 | IIB | NK                       |
| mRNA#50 | AVAST-M       | Female | 48 | IIB | NK                       |
| mRNA#51 | AVAST-M       | Male   | 58 | IIB | NK                       |
| mRNA#52 | AVAST-M       | Male   | 40 | IIB | NK                       |
| mRNA#53 | AVAST-M       | Male   | 43 | IIB | NK                       |
| mRNA#54 | AVAST-M       | Female | 54 | IIB | NK                       |
| mRNA#55 | Madrid        | Male   | 75 | IIB | T4aN0M0                  |
| mRNA#56 | Madrid        | Female | 64 | IIB | T3bN0M0                  |
| mRNA#57 | Madrid        | Female | 85 | IIB | T3bN0M0                  |
| mRNA#58 | Madrid        | Female | 79 | IIB | T3bN0M0                  |

---

|          |         |        |    |      |         |
|----------|---------|--------|----|------|---------|
| mRNA#59  | AVAST-M | Female | 60 | IIC  | NK      |
| mRNA#60  | AVAST-M | Female | 45 | IIC  | NK      |
| mRNA#61  | AVAST-M | Female | 56 | IIC  | NK      |
| mRNA#62  | AVAST-M | Female | 65 | IIC  | NK      |
| mRNA#63  | AVAST-M | Male   | 70 | IIC  | NK      |
| mRNA#64  | AVAST-M | Male   | 67 | IIC  | NK      |
| mRNA#65  | AVAST-M | Female | 57 | IIC  | NK      |
| mRNA#66  | AVAST-M | Female | 54 | IIC  | NK      |
| mRNA#67  | AVAST-M | Female | 62 | IIC  | NK      |
| mRNA#68  | AVAST-M | Male   | 52 | IIC  | NK      |
| mRNA#69  | AVAST-M | Male   | 63 | IIC  | NK      |
| mRNA#70  | Madrid  | Female | 84 | IIC  | T4bN0M0 |
| mRNA#71  | Madrid  | Female | 46 | IIC  | T4bN0M0 |
| mRNA#72  | Madrid  | Male   | 58 | IIC  | T4bN0M0 |
| mRNA#73  | Madrid  | Female | 84 | IIC  | T4bN0M0 |
| mRNA#74  | AVAST-M | Female | 40 | IIIA | NK      |
| mRNA#75  | AVAST-M | Female | 40 | IIIA | NK      |
| mRNA#76  | AVAST-M | Female | 43 | IIIA | NK      |
| mRNA#77  | AVAST-M | Male   | 60 | IIIA | NK      |
| mRNA#78  | AVAST-M | Male   | 35 | IIIA | NK      |
| mRNA#79  | AVAST-M | Male   | 54 | IIIA | NK      |
| mRNA#80  | AVAST-M | Male   | 65 | IIIA | NK      |
| mRNA#81  | AVAST-M | Female | 37 | IIIA | NK      |
| mRNA#82  | AVAST-M | Male   | 59 | IIIA | NK      |
| mRNA#83  | AVAST-M | Female | 37 | IIIA | NK      |
| mRNA#84  | AVAST-M | Male   | 37 | IIIA | NK      |
| mRNA#85  | AVAST-M | Male   | 24 | IIIA | NK      |
| mRNA#86  | AVAST-M | Male   | 62 | IIIA | NK      |
| mRNA#87  | AVAST-M | Male   | 65 | IIIA | NK      |
| mRNA#88  | AVAST-M | Male   | 56 | IIIA | NK      |
| mRNA#89  | AVAST-M | Male   | 61 | IIIA | NK      |
| mRNA#90  | AVAST-M | Female | 37 | IIIA | NK      |
| mRNA#91  | Madrid  | Male   | 69 | IIIA | NK      |
| mRNA#92  | AVAST-M | Female | 45 | IIIB | NK      |
| mRNA#93  | AVAST-M | Female | 51 | IIIB | NK      |
| mRNA#94  | AVAST-M | Male   | 62 | IIIB | NK      |
| mRNA#95  | AVAST-M | Female | 70 | IIIB | NK      |
| mRNA#96  | AVAST-M | Female | 54 | IIIB | NK      |
| mRNA#97  | AVAST-M | Female | 65 | IIIB | NK      |
| mRNA#98  | AVAST-M | Female | 41 | IIIB | NK      |
| mRNA#99  | AVAST-M | Male   | 66 | IIIB | NK      |
| mRNA#100 | AVAST-M | Female | 72 | IIIB | NK      |
| mRNA#101 | AVAST-M | Male   | 55 | IIIB | NK      |
| mRNA#102 | AVAST-M | Male   | 43 | IIIB | NK      |
| mRNA#103 | AVAST-M | Male   | 57 | IIIB | NK      |
| mRNA#104 | AVAST-M | Female | 65 | IIIB | NK      |
| mRNA#105 | AVAST-M | Female | 29 | IIIB | NK      |

---



|          |         |        |    |        |                     |
|----------|---------|--------|----|--------|---------------------|
| mRNA#106 | AVAST-M | Female | 49 | IIIB   | NK                  |
| mRNA#107 | AVAST-M | Male   | 61 | IIIB   | NK                  |
| mRNA#108 | AVAST-M | Male   | 59 | IIIB   | NK                  |
| mRNA#109 | AVAST-M | Male   | 61 | IIIB   | NK                  |
| mRNA#110 | AVAST-M | Male   | 50 | IIIB   | NK                  |
| mRNA#111 | AVAST-M | Male   | 23 | IIIB   | NK                  |
| mRNA#112 | AVAST-M | Female | 62 | IIIB   | NK                  |
| mRNA#113 | Madrid  | Male   | 88 | IIIB   | T1aN2cM0            |
| mRNA#114 | Madrid  | Female | 70 | IIIB   | T1aN2cM0            |
| mRNA#115 | Oxford  | NK     | NK | IIIB-C | NK                  |
| mRNA#116 | AVAST-M | Female | 33 | IIIC   | NK                  |
| mRNA#117 | AVAST-M | Female | 76 | IIIC   | NK                  |
| mRNA#118 | AVAST-M | Male   | 55 | IIIC   | NK                  |
| mRNA#119 | AVAST-M | Male   | 63 | IIIC   | NK                  |
| mRNA#120 | AVAST-M | Male   | 48 | IIIC   | NK                  |
| mRNA#121 | AVAST-M | Male   | 53 | IIIC   | NK                  |
| mRNA#122 | AVAST-M | Male   | 50 | IIIC   | NK                  |
| mRNA#123 | AVAST-M | Female | 46 | IIIC   | NK                  |
| mRNA#124 | AVAST-M | Male   | 27 | IIIC   | NK                  |
| mRNA#125 | AVAST-M | Female | 80 | IIIC   | NK                  |
| mRNA#126 | AVAST-M | Female | 73 | IIIC   | NK                  |
| mRNA#127 | AVAST-M | Female | 64 | IIIC   | NK                  |
| mRNA#128 | AVAST-M | Female | 53 | IIIC   | NK                  |
| mRNA#129 | AVAST-M | Female | 41 | IIIC   | NK                  |
| mRNA#130 | AVAST-M | Male   | 58 | IIIC   | NK                  |
| mRNA#131 | AVAST-M | Male   | 59 | IIIC   | NK                  |
| mRNA#132 | Madrid  | Female | 81 | IIIC   | T4bN3M0             |
| mRNA#133 | Madrid  | Male   | 85 | IIIC   | T3bN3M0             |
| mRNA#134 | Madrid  | Female | 80 | IIIC   | T3bN2cM0            |
| mRNA#135 | Madrid  | Male   | 74 | IIIC   | T2bN3M0             |
| mRNA#136 | Madrid  | Male   | 70 | IV     | T4aN2M1             |
| mRNA#137 | Madrid  | Female | 55 | IV     | T4aN2M1             |
| mRNA#138 | Madrid  | Male   | 46 | IV     | TxN3M1              |
| mRNA#139 | Madrid  | Female | 71 | IV     | TxN2cM1             |
| mRNA#140 | Madrid  | Male   | 58 | IV     | Metástasis melanoma |
| mRNA#141 | Madrid  | Female | 55 | IV     | T3aN0M1             |
| mRNA#142 | Madrid  | Male   | 61 | IV     | T4aN3M1             |
| mRNA#143 | Oxford  | NK     | NK | IV     | NK                  |

**Table S3.** Clinical details of patients used in miRNA validation cohort. NK— not known.

| ID     | Cohort   | Gender | Age | Stage   | TNM |
|--------|----------|--------|-----|---------|-----|
| Cont#1 | Biobanco | Female | 59  | Control | -   |
| Cont#2 | Biobanco | Male   | 55  | Control | -   |
| Cont#3 | Biobanco | Female | 65  | Control | -   |
| Cont#4 | Biobanco | Female | 68  | Control | -   |
| Cont#5 | Biobanco | Female | 64  | Control | -   |
| Cont#6 | Biobanco | Male   | 60  | Control | -   |

|          |               |        |    |         |                          |
|----------|---------------|--------|----|---------|--------------------------|
| Cont#7   | Biobanco      | Male   | 57 | Control | -                        |
| Cont#8   | Biobanco      | Male   | 51 | Control | -                        |
| Cont#9   | Biobanco      | Male   | 51 | Control | -                        |
| Cont#10  | Biobanco      | Male   | 56 | Control | -                        |
| Cont#11  | Biobanco      | Male   | 62 | Control | -                        |
| Cont#12  | Biobanco      | Female | 56 | Control | -                        |
| Cont#13  | Biobanco      | Female | 60 | Control | -                        |
| Cont#14  | Biobanco      | Female | 58 | Control | -                        |
| Cont#15  | Biobanco      | NK     |    | Control | -                        |
| Cont#16  | Biobanco      | NK     |    | Control | -                        |
| Cont#17  | Biobanco      | Female | 64 | Control | -                        |
| Cont#18  | Biobanco      | Female | 54 | Control | -                        |
| Cont#19  | Biobanco      | Male   | 53 | Control | -                        |
| Cont#20  | Biobanco      | Female | 55 | Control | -                        |
| Cont#21  | Biobanco      | Male   | 59 | Control | -                        |
| Cont#22  | Biobanco      | Female | 57 | Control | -                        |
| Cont#23  | Biobanco      | Male   | 58 | Control | -                        |
| Cont#24  | Biobanco      | Female | 60 | Control | -                        |
| Cont#25  | Biobanco      | Female | 60 | Control | -                        |
| Cont#26  | Biobanco      | Female | 56 | Control | -                        |
| Cont#27  | Biobanco      | Male   | 55 | Control | -                        |
| Cont#28  | Biobanco      | Male   | 58 | Control | -                        |
| miRNA#1  | San Sebastián | Male   | 66 | 0       | pT1sN0M0                 |
| miRNA#2  | San Sebastián | Female | 41 | 0       | pTisN0M0                 |
| miRNA#3  | San Sebastián | Female | 45 | 0       | pTisN0M0                 |
| miRNA#4  | San Sebastián | Female | 51 | 0       | pTisN0M0                 |
| miRNA#5  | San Sebastián | Female | 62 | 0       | pT1sN0M0                 |
| miRNA#6  | Madrid        | Male   | 66 | 0       | Léntigo maligno          |
| miRNA#7  | Madrid        | NK     | 75 | 0       | TisN0M0                  |
| miRNA#8  | Madrid        | Male   | 52 | 0       | Léntigo maligno. In situ |
| miRNA#9  | Madrid        | NK     | 52 | 0       | Léntigo maligno. In situ |
| miRNA#10 | Madrid        | Female | 84 | 0       | Léntigo maligno. In situ |
| miRNA#11 | Madrid        | Male   | 43 | 0       | Léntigo maligno. In situ |
| miRNA#12 | Madrid        | Female | 33 | 0       | TisN0M0                  |
| miRNA#13 | Madrid        | NK     | 61 | 0       | TisN0M0                  |
| miRNA#14 | Madrid        | NK     | 43 | 0       | TisN0M0                  |
| miRNA#15 | San Sebastián | Female | 55 | 0       | pT1sN0M0                 |
| miRNA#16 | San Sebastián | Female | 77 | 0       | pT1a Melanoma in situ    |
| miRNA#17 | San Sebastián | Female | 47 | 0       | pT1sN0M0                 |
| miRNA#18 | San Sebastián | Female | 15 | 0       | pT1sN0M0                 |
| miRNA#19 | San Sebastián | Female | 43 | 0       | pT1sN0M0                 |
| miRNA#20 | San Sebastián | Female | 59 | 0       | pT1sN0M0                 |
| miRNA#21 | San Sebastián | Female | 49 | 0       | pT1sN0M0                 |
| miRNA#22 | San Sebastián | Female | 51 | 0       | pT1s                     |
| miRNA#23 | San Sebastián | Female | 65 | 0       | pT1sN0M0                 |
| miRNA#24 | San Sebastián | Female | 51 | 0       | pT1sN0M0                 |
| miRNA#25 | San Sebastián | Male   | 72 | 0       | pT1sN0M0                 |

|          |               |        |    |      |           |
|----------|---------------|--------|----|------|-----------|
| miRNA#26 | San Sebastián | Female | 52 | 0    | pT1sN0M0  |
| miRNA#27 | San Sebastián | Female | 48 | 0    | pT1sN0M0  |
| miRNA#28 | San Sebastián | Female | 40 | 0    | pT1sN0M0  |
| miRNA#29 | San Sebastián | Male   | 51 | 0    | pT1sN0M0  |
| miRNA#30 | San Sebastián | Female | 43 | IA   | pT1aN0M0  |
| miRNA#31 | San Sebastián | Female | 48 | IA   | pT1aN0M0  |
| miRNA#32 | San Sebastián | Female | 33 | IA   | pT1aN0M0  |
| miRNA#33 | San Sebastián | Female | 48 | IA   | pT1aN0M0  |
| miRNA#34 | San Sebastián | Male   | 44 | IA   | pT1aN0M0  |
| miRNA#35 | San Sebastián | Male   | 31 | IA   | pT1aN0M0  |
| miRNA#36 | Madrid        | Female | 37 | IA   | T1aN0M0   |
| miRNA#37 | Madrid        | NK     | 75 | IA   | T1aN0M0   |
| miRNA#38 | Madrid        | NK     | NK | IA   | T1aN0M0   |
| miRNA#39 | Madrid        | Male   | 57 | IA   | T1aN0M0   |
| miRNA#40 | Madrid        | NK     | 80 | IA   | T1aN0M0   |
| miRNA#41 | San Sebastián | Male   | 67 | IB   | PT2aN0M0  |
| miRNA#42 | Madrid        | Male   | 86 | IB   | T2aN0M0   |
| miRNA#43 | Madrid        | NK     | 67 | IB   | T2aN0M0   |
| miRNA#44 | Madrid        | NK     | 60 | IB   | T2aN0M0   |
| miRNA#45 | Madrid        | Female | 37 | IB   | T2aN0M0   |
| miRNA#46 | Madrid        | NK     | 76 | IB   | T1bN0M0   |
| miRNA#47 | San Sebastián | Female | 68 | IIA  | pT2bN0M0  |
| miRNA#48 | Madrid        | NK     | 71 | IIA  | T3aN0M0   |
| miRNA#49 | Madrid        | Male   | 79 | IIA  | T3aN0M0   |
| miRNA#50 | San Sebastián | Female | 71 | IIA  | pT3a      |
| miRNA#51 | San Sebastián | Female | 69 | IIA  | pT2bN0    |
| miRNA#52 | San Sebastián | Male   | 48 | IIB  | pT4N0M0   |
| miRNA#53 | Madrid        | Female | 85 | IIB  | T3bN0M0   |
| miRNA#54 | Madrid        | Female | 79 | IIB  | T3bN0M0   |
| miRNA#55 | San Sebastián | Female | 83 | IIB  | pT4aN0M0. |
| miRNA#56 | San Sebastián | Male   | 51 | IIB  | pT3bN0M0  |
| miRNA#57 | Madrid        | NK     | 64 | IIC  | T4bN0M0   |
| miRNA#58 | Madrid        | Female | 84 | IIC  | T4bN0M0   |
| miRNA#59 | Madrid        | NK     | 87 | IIC  | T4bN0M0   |
| miRNA#60 | San Sebastián | Female | 53 | IIC  | t4bn0M0   |
| miRNA#61 | San Sebastián | Male   | 62 | IIC  | t4bn0M0   |
| miRNA#62 | San Sebastián | NK     | 47 | IIC  | pT4bN0M0  |
| miRNA#63 | San Sebastián | Female | 55 | III  | TxN1M0    |
| miRNA#64 | San Sebastián | Female | 20 | IIIA | pT3N1aM0  |
| miRNA#65 | San Sebastián | Male   | 62 | IIIA | pT3aN2aM0 |
| miRNA#66 | San Sebastián | Male   | 42 | IIIA | pT2N1aM0  |
| miRNA#67 | Madrid        | NK     | 54 | IIIA | T4aN2aM0  |
| miRNA#68 | San Sebastián | Female | 58 | IIIA | T2aN1aM0  |
| miRNA#69 | San Sebastián | Female | 40 | IIIA | -         |
| miRNA#70 | San Sebastián | Male   | 45 | IIIA | txn2m0    |
| miRNA#71 | San Sebastián | Male   | 57 | IIIA | t4an1am0  |
| miRNA#72 | San Sebastián | Female | 52 | IIIA | t3an1m0   |

|          |               |        |    |      |            |
|----------|---------------|--------|----|------|------------|
| miRNA#73 | AVAST-M       | Male   | 53 | IIIA |            |
| miRNA#74 | San Sebastián | Female | 41 | IIIA | pT3bN1cM0  |
| miRNA#75 | San Sebastián | Female | 65 | IIIB | pT2bN2aM0  |
| miRNA#76 | San Sebastián | Female | 62 | IIIB | T3bN2cM0   |
| miRNA#77 | San Sebastián | Female | 38 | IIIB | T2aN2aM0   |
| miRNA#78 | San Sebastián | Female | 60 | IIIB | T2aN1bM0   |
| miRNA#79 | AVAST-M       | Female | 55 | IIIB |            |
| miRNA#80 | AVAST-M       | Female | 60 | IIIB |            |
| miRNA#81 | AVAST-M       | Male   | 33 | IIIB |            |
| miRNA#82 | AVAST-M       | Male   | 48 | IIIB |            |
| miRNA#83 | AVAST-M       | Female | 46 | IIIB |            |
| miRNA#84 | San Sebastián | Female | 62 | IIIB | pT3N2aM0   |
| miRNA#85 | San Sebastián | Male   | 69 | IIIC | pT3aN3M0   |
| miRNA#86 | Madrid        | NK     | 44 | IIIC | T2bN3M0    |
| miRNA#87 | Madrid        | Male   | 74 | IIIC | T2bN3M0    |
| miRNA#88 | San Sebastián | Female | 41 | IIIC | pT3aN3M0   |
| miRNA#89 | Madrid        | Female | 80 | IIIC | T3bN2cM0   |
| miRNA#90 | Madrid        | Female | 71 | IV   | TxN2cM1    |
| miRNA#91 | Madrid        | Male   | 61 | IV   | T4aN3M1    |
| miRNA#92 | Madrid        | Female | 55 | IV   | T3aN0M1    |
| miRNA#93 | Madrid        | NK     |    | IV   | metastatic |
| miRNA#94 | San Sebastián | Male   | 59 | IV   | t4bn0m1a   |
| miRNA#95 | San Sebastián | Female | 48 | IV   | E.IV (M1b) |
| miRNA#96 | Madrid        | Male   | 58 | IV   | metastatic |

**Table S4.** Clinical details of patients used in yRNA validation cohort. NK—not known.

| ID      | Origin | Gender | Age | Stage   | TNM |
|---------|--------|--------|-----|---------|-----|
| Cont#1  |        | Male   | 53  | Control | -   |
| Cont#2  |        | Male   | 51  | Control | -   |
| Cont#3  |        | Male   | 56  | Control | -   |
| Cont#4  |        | Male   | 62  | Control | -   |
| Cont#5  |        | Female | 56  | Control | -   |
| Cont#6  |        | Female | 60  | Control | -   |
| Cont#7  |        | Female | 60  | Control | -   |
| Cont#8  |        | Female | 58  | Control | -   |
| Cont#9  |        | Female | 64  | Control | -   |
| Cont#10 |        | Female | 54  | Control | -   |
| Cont#11 |        | Male   | 53  | Control | -   |
| Cont#12 |        | Female | 55  | Control | -   |
| Cont#13 |        | Male   | 59  | Control | -   |
| Cont#14 |        | Female | 57  | Control | -   |
| Cont#15 |        | Male   | 58  | Control | -   |
| Cont#16 |        | Female | 60  | Control | -   |
| Cont#17 |        | Female | 60  | Control | -   |
| Cont#18 |        | Female | 56  | Control | -   |
| Cont#19 |        | Male   | 55  | Control | -   |
| Cont#20 |        | Male   | 58  | Control | -   |

|         |        |    |         |           |
|---------|--------|----|---------|-----------|
| Cont#21 | Male   | 60 | Control | -         |
| Cont#22 | Male   | 53 | Control | -         |
| yRNA#1  | Male   | 45 | 0       | TisN0M0   |
| yRNA#2  | NK     | 41 | 0       | TisN0M0   |
| yRNA#3  | NK     | 45 | 0       | TisN0M0   |
| yRNA#4  | NK     | 51 | 0       | TisN0M0   |
| yRNA#5  | NK     | 62 | 0       | T1sN0M0   |
| yRNA#6  | Male   | 84 | 0       | TisN0M0   |
| yRNA#7  | Male   | 56 | 0       | TisN0M0   |
| yRNA#8  | Female | 47 | 0       | pT1sN0M0  |
| yRNA#9  | Female | 15 | 0       | pT1sN0M0  |
| yRNA#10 | Female | 43 | 0       | pT1sN0M0  |
| yRNA#11 | Female | 59 | 0       | pT1sN0M0  |
| yRNA#12 | Female | 49 | 0       | pT1sN0M0  |
| yRNA#13 | Female | 51 | 0       | pT1s      |
| yRNA#14 | Female | 65 | 0       | pT1sN0M0  |
| yRNA#15 | Female | 51 | 0       | pT1sN0M0  |
| yRNA#16 | Male   | 71 | 0       | pT1sN0M0  |
| yRNA#17 | Female | 52 | 0       | pT1sN0M0  |
| yRNA#18 | Female | 48 | 0       | pT1sN0M0  |
| yRNA#19 | Female | 40 | 0       | pT1sN0M0  |
| yRNA#20 | Male   | 51 | 0       | pT1sN0M0  |
| yRNA#21 | Female | 39 | IA      | T1N0M0    |
| yRNA#22 | Female | 43 | IA      | T1aN0M0   |
| yRNA#23 | Female | 48 | IA      | T1aN0M0   |
| yRNA#24 | Female | 33 | IA      | T1aN0M0   |
| yRNA#25 | Female | 48 | IA      | T1aN0M0   |
| yRNA#26 | Male   | 44 | IA      | T1aN0M0   |
| yRNA#27 | Male   | 31 | IA      | T1aN0M0   |
| yRNA#28 | Male   | 16 | IB      | T2aN0M0   |
| yRNA#29 | Male   | 67 | IB      | T2aN0M0   |
| yRNA#30 | Male   | 79 | IIA     | T3N0M0    |
| yRNA#31 | Female | 68 | IIA     | T2bN0M0   |
| yRNA#32 | Male   | 72 | IIB     | T4aN0M0   |
| yRNA#33 | Male   | 67 | IIB     | T4aN0M0   |
| yRNA#34 | Male   | 48 | IIB     | T4N0M0    |
| yRNA#35 | Female | 46 | IIC     | T4bN0M0   |
| yRNA#36 | Male   | 58 | IIC     | T4bN0M0   |
| yRNA#37 | Female | 84 | IIC     | T4bN0M0   |
| yRNA#38 | Female | 55 | III     | NK        |
| yRNA#39 | Female | 41 | IIIA    | T3bN1cM0  |
| yRNA#40 | Female | 49 | IIIA    | T4N1M0    |
| yRNA#41 | Male   | 62 | IIIA    | T3aN2aM0  |
| yRNA#42 | Male   | 42 | IIIA    | T2N1aM0   |
| yRNA#43 | Male   | 69 | IIIA    | T4aN1M0   |
| yRNA#44 | Female | 40 | IIIA    | NK        |
| yRNA#45 | Female | 60 | IIIA    | pT2aN1aM0 |

|         |        |    |      |            |
|---------|--------|----|------|------------|
| yRNA#46 | Female | 40 | IIIB | pT2aN2aM0  |
| yRNA#47 | Female | 65 | IIIB | T2bN2aM0   |
| yRNA#48 | Male   | 88 | IIIB | T1aN2cM0   |
| yRNA#49 | Female | 62 | IIIB | pT3bN2c    |
| yRNA#50 | Female | 60 | IIIB | pT2aN1bM0  |
| yRNA#51 | Male   | 69 | IIIC | T3bN2cM0   |
| yRNA#52 | Male   | 69 | IIIC | T3aN3M0    |
| yRNA#53 | Female | 81 | IIIC | T4bN3M0    |
| yRNA#54 | Female | 80 | IIIC | T3bN2cM0   |
| yRNA#55 | Male   | 61 | IV   | T4aN3M1    |
| yRNA#56 | Female | 71 | IV   | TxN2cM1    |
| yRNA#57 | Female | 55 | IV   | T3aN0M1    |
| yRNA#58 | Male   | 58 | IV   | Metastasis |

**Table S5.** Characteristics of selected differentially protein-encoding gene fragment probe sets.

| <i>probe set ID</i> | <i>Gene</i> | <i>Exon (Amino acid position)*</i> | <i>Length</i> | <i>Sequence</i>                                                                                                                                                                          |
|---------------------|-------------|------------------------------------|---------------|------------------------------------------------------------------------------------------------------------------------------------------------------------------------------------------|
| 2648985             | ATM         | 1 (63-109)                         | 143           | ATTTTACAGAAATATATTCAGAAAGAAA<br>CAGAATGTCTGAGAATAGCAAAACCAAAT<br>GTATCAGCCTCAACACAAGCCTCCAGGCA<br>GAAAAAGATGCAGGAAATCAGTAGTTTGG<br>TCAAATACTTCATCAAATGTGCAAACAGA<br>A                    |
| 667389              | AMFR        | 1<br>(59nt(5'UTR)1-10)             | 104           | AATTGGGACAGGCCTCCTCCAGTCAGTCG<br>GGCACAGGGCGCAGGAGGCAGCTGAGGA<br>AGGCAAGGGAGCGCTAGGAGGTCTGCTGC<br>TTCTGAAGCCTCCGTTCCG<br>GACCCCAAATCAAATTTGATCCAACAGTG<br>GTTGTCACAACAAAGTGATCTTGGAGTCAT |
| 731164              | CD109       | 5 (170-211)                        | 125           | TTCCAAAACTTTTAGCTATCTTCCCATCC<br>AATACTGGTGACTGGTCTATTCAAGTTCA<br>AGTGAAT                                                                                                                |
| 730641              | SOS1        | 8 (798-836)                        | 119           | TTCTCAAACCACAGAGTGAGGTTGGTGGT<br>ATGTCGAATCATTTTCAGAAGATTAGGAG<br>AGTTAATTTCTTTGTCTTCTTTGTCCACAC<br>ACTTCCAATAATTCTGATGGCTGTACAGC<br>T                                                   |

\* positions and exon number relative to refseq transcript.

**Table S6.** Summary of NGS results from pooled RNA samples.

| <b>Pool (n, µg (RNA))</b> | <b>Reads (10<sup>6</sup>)</b> | <b>Phread score</b> | <b>Mapped (10<sup>6</sup>)</b> | <b>Mapped sRNA* (10<sup>6</sup>)</b> |
|---------------------------|-------------------------------|---------------------|--------------------------------|--------------------------------------|
| Cont. (8, 2.96)           | 49.79                         | 37.93               | 27.83 (55%)                    | 14.38 (29%)                          |
| Stage 0 (5, 2.07)         | 57.91                         | 37.89               | 31.94 (55%)                    | 11.68 (20%)                          |
| Stage I/II (8, 3.45)      | 49.37                         | 37.86               | 24.97 (51%)                    | 13.14 (27%)                          |
| Stage III (7, 3.20)       | 49.15                         | 37.87               | 26.54 (54%)                    | 12.20 (25%)                          |
| Stage IV (8, 2.96)        | 41.45                         | 37.89               | 20.69 (50%)                    | 9.14 (23%)                           |

\* sRNA (shortRNA) was defined as sequences between 18–43 nt.



**Table S7.** YRNA reads from NGS. \*% of total YRNA counts.

|                     | <b>Cont.</b>                            | <b>Stage 0</b>                          | <b>Stage I/II</b>                       | <b>Stage III</b>                        | <b>Stage IV</b>                         |
|---------------------|-----------------------------------------|-----------------------------------------|-----------------------------------------|-----------------------------------------|-----------------------------------------|
| <b>RNY/RNY4 *</b>   | 1,494,240 (25.6%) /1,399,490<br>(24%)   | 1,233,516 (26.2%)<br>/1,185,336 (25.2%) | 1,141,496(25.3%) /1,085,019<br>(24.1%)  | 1,284,278 (26.4%)<br>/1,175,099 (24.2%) | 1,179,907 (27.1%)<br>/1,120,159 (25.7%) |
| <b>RNYP/RNYP4 *</b> | 2,833,938 (48.6%) /2,830,682<br>(48.5%) | 2,290,363 (48.7%) /2,288,302<br>(48.7%) | 2,190,406 (48.6%) /2,187,535<br>(48.5%) | 2,313,285 (47.6%)<br>/2,310,512 (47.6%) | 2,113,392 (48.5%)<br>/2,111,236 (48.4%) |
| <b>Rfam YRNA *</b>  | 1,511,724 (25.9%)                       | 1,176,482 (25%)                         | 1,176,210 (26.1%)                       | 1,258,188 (25.9%)                       | 1,065,461 (24.4%)                       |
| <b>Total reads</b>  | <b>5,839,905</b>                        | <b>4,700,362</b>                        | <b>4,508,112</b>                        | <b>4,855,751</b>                        | <b>4,358,760</b>                        |

© 2019 by the authors. Submitted for possible open access publication under the terms and conditions of the Creative Commons Attribution

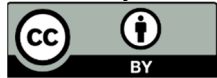

in (CC BY) license (<http://creativecommons.org/licenses/by/4.0/>).
